# Supplementary material for: Incidence and management of metabolic acidosis with sodium bicarbonate in the ICU: An international observational study
Source: Springer Nature journal article supplement (doi:10.1186/s13054-020-03431-2), 2021-02-02
Supplement: MOESM1 [file 18826200]

**Supplementary Figure 1.** Diagram of screening and patient data collection. Every patient meeting the criteria were registered until 10 patients in each group (NaHCO<sub>3</sub> vs no-NaHCO<sub>3</sub>)

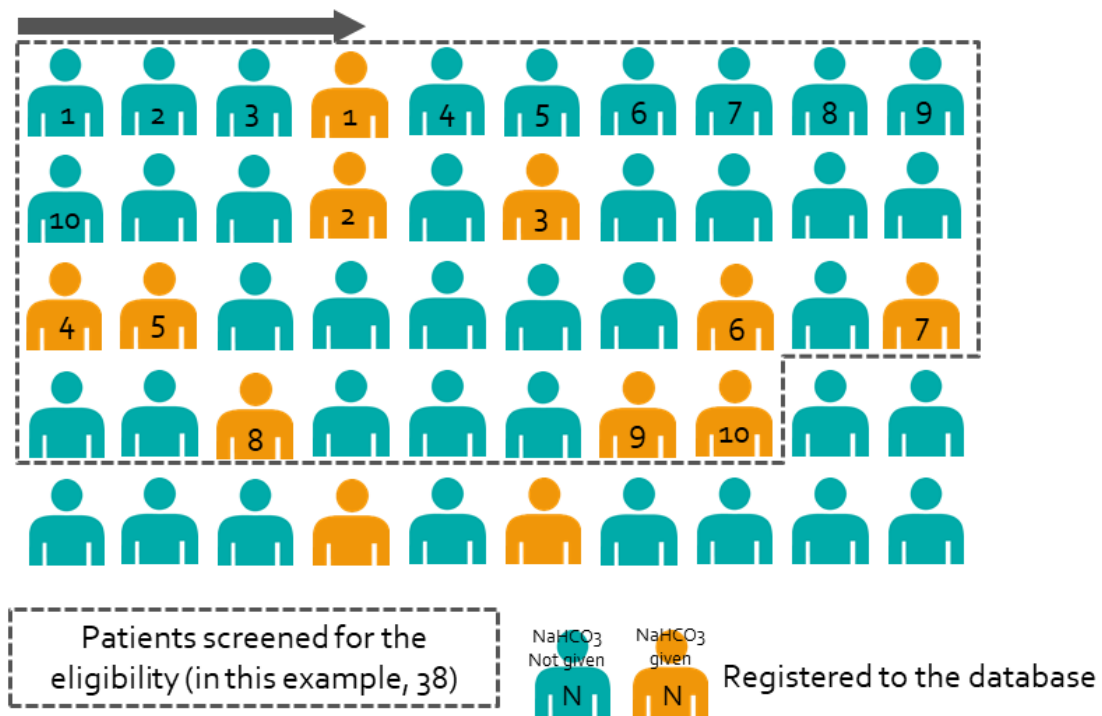

**Supplementary Figure 2.** The total amount of sodium bicarbonate by body weight, base excess or bicarbonate levels.

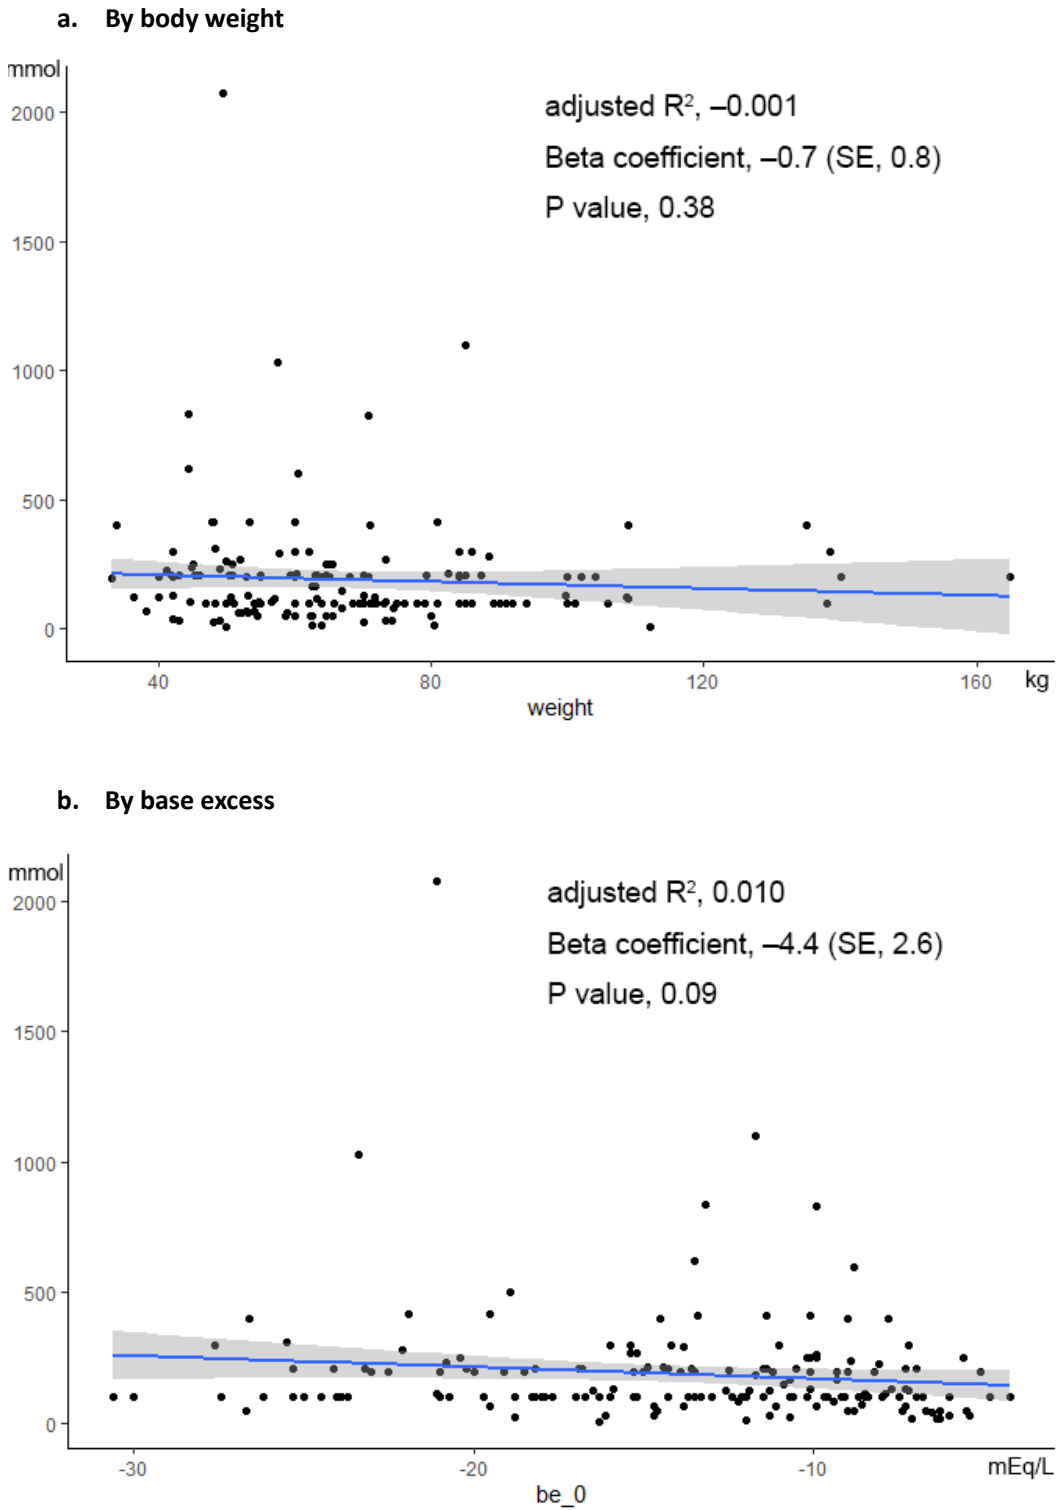

**c. By bicarbonate levels**

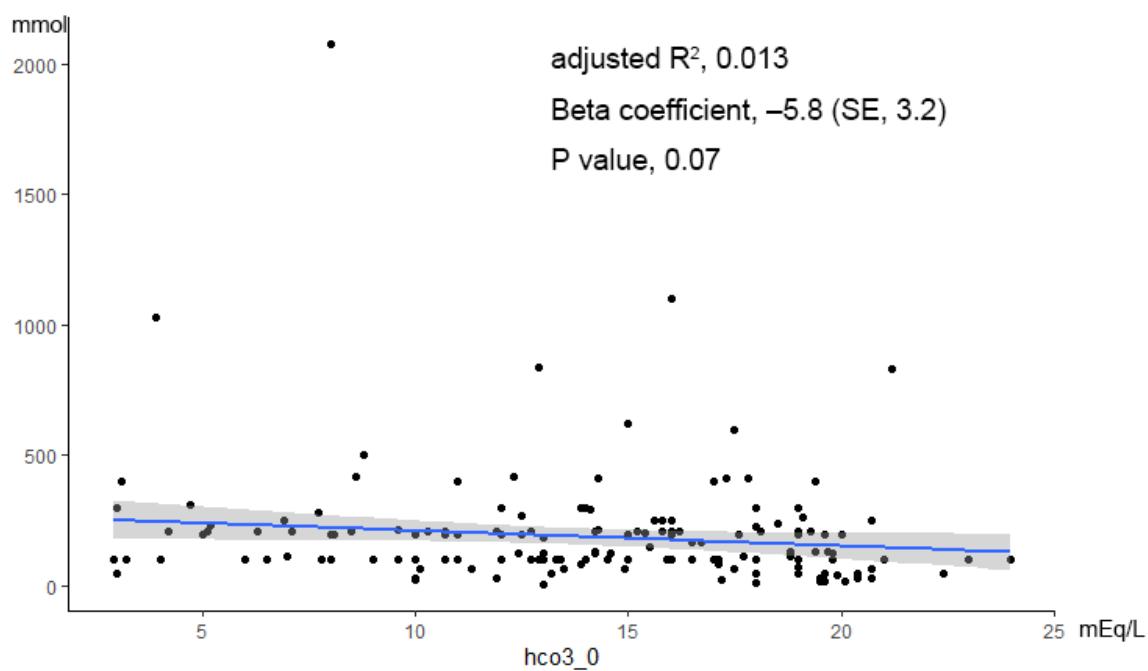

**Supplementary Figure 3.** Need for renal replacement therapy over 24 hours of metabolic acidosis by treatment group.

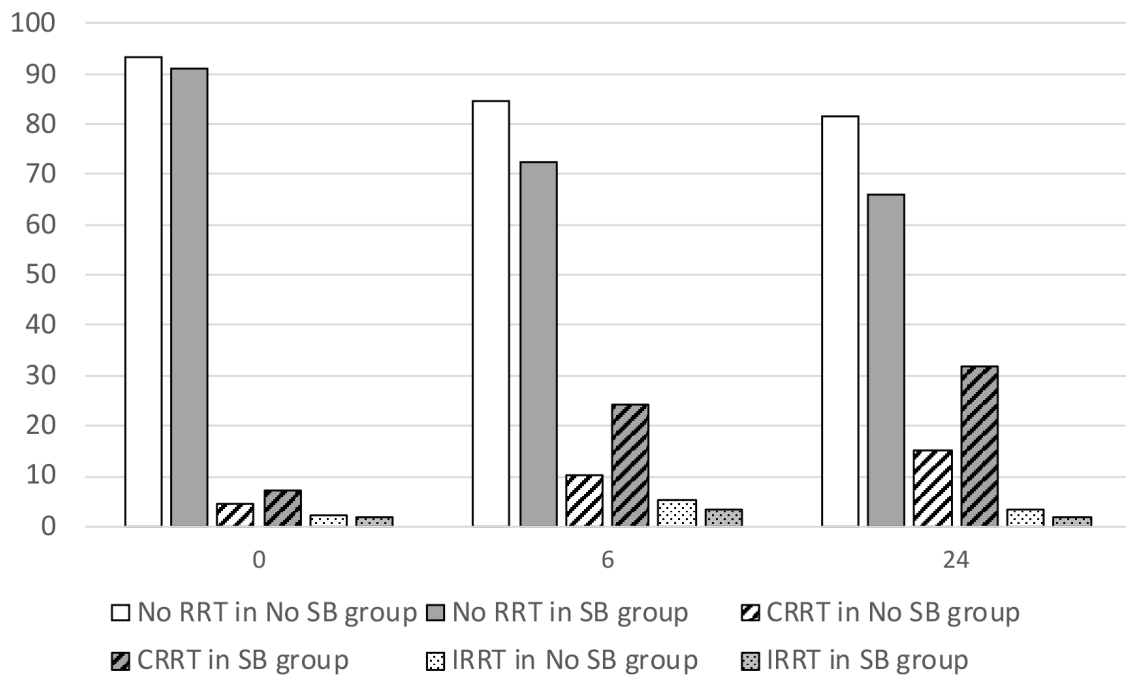

**Supplementary Figure 4.** Distribution of patients with severe metabolic acidosis. Red bar = overall population, blue bar= subpopulation with the criteria.

a.  $\text{pH} < 7.2$  and  $\text{PaCO}_2 \leq 45$  mmHg

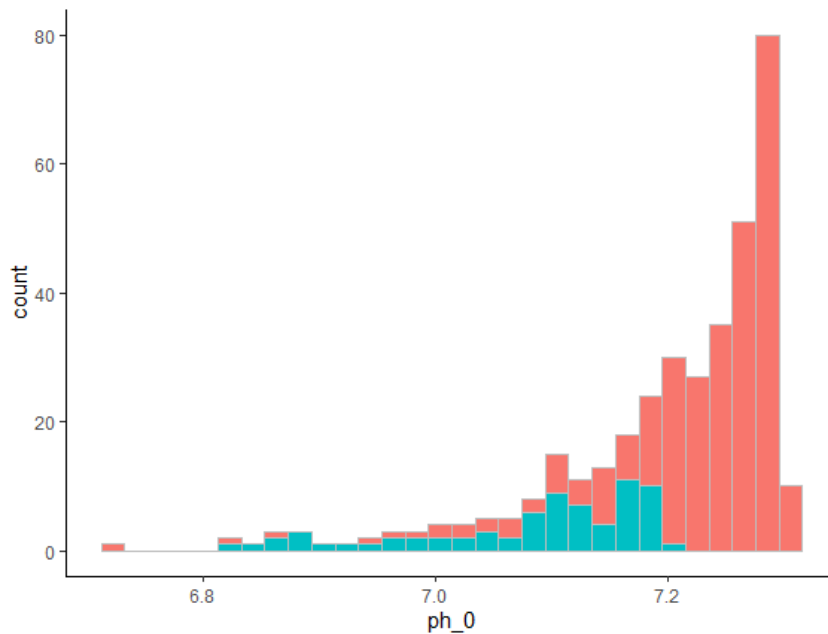

b.  $\text{pH} < 7.2$  AND  $\text{PaCO}_2 \leq 45$  mmHg AND  $\text{HCO}_3 \leq 20$  mEq/L AND Lactate  $\geq 2.0$  mmol/L

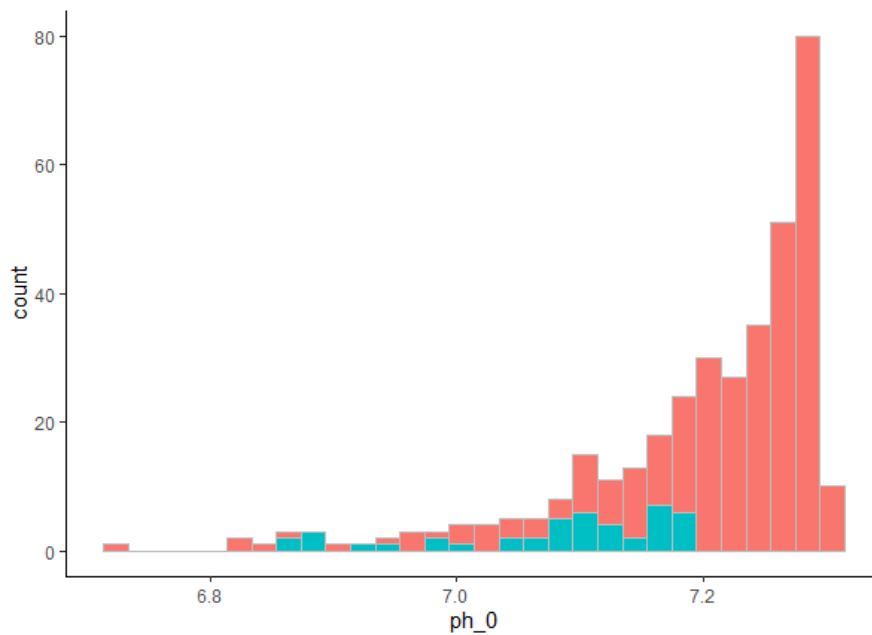

**Supplementary Table 1.** Characteristics at ICU admission in patients with vasopressor dependency at the diagnosis of metabolic acidosis

|                                                   | No SB (N=77)       | SB (N=110)         | p value |
|---------------------------------------------------|--------------------|--------------------|---------|
| Age, years                                        | 69.6 [59.4, 81.0]  | 66.1 [53.0, 76.1]  | 0.04    |
| Sex, male                                         | 52 (67.5)          | 60 (54.5)          | 0.10    |
| Weight, kg                                        | 73.0 [59.2, 85.0]  | 64.0 [52.0, 81.0]  | 0.05    |
| Height, cm                                        | 164 [158, 172]     | 166 [155, 172]     | 0.99    |
| ICU admission source                              |                    |                    | 0.05    |
| Operation theatre                                 | 32 (41.6)          | 24 (21.8)          |         |
| Emergency department                              | 22 (28.6)          | 46 (41.8)          |         |
| Ward                                              | 16 (20.8)          | 32 (29.1)          |         |
| Other hospital                                    | 5 ( 6.5)           | 6 ( 5.5)           |         |
| ICU in other hospital                             | 2 ( 2.6)           | 2 ( 1.8)           |         |
| Treatment goals on admission                      |                    |                    | 0.21    |
| Full active management                            | 68 (88.3)          | 94 (85.5)          |         |
| Treatment limitation order                        | 9 (11.7)           | 10 ( 9.1)          |         |
| Palliative care                                   | 0 ( 0.0)           | 5 ( 4.5)           |         |
| Potential organ donation                          | 0 ( 0.0)           | 1 ( 0.9)           |         |
| Cardiac arrest in 24 hours prior to ICU admission |                    |                    | 0.34    |
| Yes                                               | 14 (18.2)          | 28 (25.5)          |         |
| No                                                | 63 (81.8)          | 81 (73.6)          |         |
| Unknown                                           | 0 ( 0.0)           | 1 ( 0.9)           |         |
| Chronic hemo/peritoneal-dialysis                  | 6 ( 7.8)           | 4 ( 3.6)           | 0.36    |
| Baseline creatinine, mmol/L                       | 93.0 [74.3, 185.4] | 97.0 [57.1, 142.0] | 0.27    |
| AKI                                               |                    |                    | 0.08    |
| No AKI                                            | 24 (45.3)          | 23 (29.5)          |         |
| Stage 1                                           | 15 (28.3)          | 17 (21.8)          |         |
| Stage 2                                           | 3 ( 5.7)           | 8 (10.3)           |         |
| Stage 3                                           | 11 (20.8)          | 30 (38.5)          |         |
| APACHE III score                                  | 70 [51, 95]        | 99 [71, 129]       | <0.001  |

**Supplementary Table 2.** Arterial blood gas analysis and electrolytes in patients with vasopressor dependency at the diagnosis of metabolic acidosis. pH, PaO<sub>2</sub>, PaCO<sub>2</sub>, HCO<sub>3</sub>, Base Excess, and lactate were only measured for arterial blood samples.

|                                    | No SB (N=77)         | SB (N=110)           | p value |
|------------------------------------|----------------------|----------------------|---------|
| pH                                 | 7.26 [7.22, 7.28]    | 7.19 [7.13, 7.25]    | <0.001  |
| PaO <sub>2</sub> , mmHg            | 109.7 [83.1, 182.2]  | 113.8 [82.4, 209.8]  | 0.45    |
| PaO <sub>2</sub> /FiO <sub>2</sub> | 238.8 [144.8, 323.3] | 230.9 [126.8, 370.8] | 0.95    |
| PaCO <sub>2</sub> , mmHg           | 43.8 [37.6, 49.0]    | 39.5 [32.1, 47.3]    | 0.04    |
| HCO <sub>3</sub> , mEq/L           | 18.2 [16.0, 20.7]    | 15.0 [11.9, 18.0]    | <0.001  |
| Base Excess, mEq/L                 | -7.9 [-10.0, -6.0]   | -12.3 [-16.1, -9.3]  | <0.001  |
| SID, mEq/L                         | 29.7 [25.8, 32.5]    | 27.6 [23.4, 31.6]    | 0.03    |
| Sodium, mEq/L                      | 137.0 [135.0, 140.0] | 137.0 [134.0, 140.0] | 0.59    |
| Potassium, mEq/L                   | 4.2 [3.8, 4.8]       | 4.3 [3.8, 5.1]       | 0.67    |
| Chloride, mEq/L                    | 109.0 [106.3, 113.0] | 107.0 [103.0, 112.0] | 0.07    |
| Lactate, mmol/L                    | 2.9 [1.8, 5.1]       | 6.6 [2.3, 10.2]      | 0.001   |
| Ionised Calcium, mmol/L            | 1.1 [1.0, 1.2]       | 1.1 [1.0, 1.2]       | 0.62    |

SB denotes sodium bicarbonate; SID, strong ion difference = Sodium + Potassium + Ionised calcium - Chloride – Lactate.

**Supplementary Table 3.** ICU interventions in patients with vasopressor dependency at the time of metabolic acidosis diagnosis

|                                                      | No SB (N=77)      | SB (N=110)        | p value |
|------------------------------------------------------|-------------------|-------------------|---------|
| Vasopressor dose, $\mu\text{g}/\text{kg}/\text{min}$ | 0.12 [0.05, 0.28] | 0.25 [0.13, 0.47] | <0.001  |
| Cardiac index monitored                              | 8 (12.1)          | 11 (12.2)         | > 0.99  |
| Cardiac index, L/min/m <sup>2</sup>                  | 2.6 [2.4, 3.0]    | 3.2 [2.4, 3.8]    | 0.33    |
| Invasive mechanical ventilation                      | 60 (77.9)         | 82 (74.5)         |         |
| Noninvasive mechanical ventilation                   | 3 ( 3.9)          | 1 ( 0.9)          |         |
| ECMO                                                 | 0 ( 0.0)          | 5 ( 4.5)          |         |
| Neuromuscular blockade                               | 13 (17.1)         | 12 (11.0)         | 0.33    |
| Renal replacement therapy                            |                   |                   | 0.71    |
| Not on RRT                                           | 69 (90.8)         | 96 (87.3)         |         |
| CRRT                                                 | 6 ( 7.9)          | 11 (10.0)         |         |
| IRRT                                                 | 1 ( 1.3)          | 3 ( 2.7)          |         |

SB denotes sodium bicarbonate; ECMO, extracorporeal membrane oxygenation; RRT, renal replacement therapy; CRRT, continuous renal replacement therapy; IRRT, intermittent renal replacement therapy.



**Supplementary Table 4.** Characteristics at ICU admission in patients with severe metabolic acidosis.

|                                                   | No SB (N=7)          | SB (N=39)           | p value |
|---------------------------------------------------|----------------------|---------------------|---------|
| Age, years                                        | 52.4 [47.7, 65.2]    | 63.3 [49.2, 70.8]   | 0.47    |
| Sex, male                                         | 3 (42.9)             | 13 (33.3)           | 0.68    |
| Weight, kg                                        | 74.0 [63.5, 81.2]    | 63.3 [53.8, 80.9]   | 0.22    |
| Height, cm                                        | 162 [160, 172]       | 162 [156, 170]      | 0.76    |
| BMI, kg/m <sup>2</sup>                            | 25.0 [25.0, 28.1]    | 22.3 [21.1, 26.6]   | 0.09    |
| ICU admission source                              |                      |                     | 0.80    |
| Operation theatre                                 | 1 (14.3)             | 3 (7.7)             |         |
| Emergency department                              | 4 (57.1)             | 24 (61.5)           |         |
| Ward                                              | 2 (28.6)             | 7 (17.9)            |         |
| Other hospital                                    | 0 (0)                | 2 (5.1)             |         |
| ICU in other hospital                             | 0 (0)                | 3 (7.7)             |         |
| Treatment goals on admission                      |                      |                     | >0.999  |
| Full active management                            | 7 (100)              | 32 (82.1)           |         |
| Treatment limitation order                        | 0 (0)                | 4 (10.3)            |         |
| Palliative care                                   | 0 (0)                | 3 (7.7)             |         |
| Cardiac arrest in 24 hours prior to ICU admission | 3 (42.9)             | 10 (25.6)           | 0.39    |
| Chronic hemo/peritoneal-dialysis                  | 4 (57.1)             | 3 (7.7)             | 0.01    |
| Baseline creatinine, mmol/L                       | 259.0 [104.0, 342.0] | 117.5 [72.6, 157.4] | 0.23    |
| AKI                                               |                      |                     | 0.70    |
| No AKI                                            | 3 (60.0)             | 8 (29.6)            |         |
| Stage 1                                           | 0 (0)                | 5 (18.5)            |         |
| Stage 2                                           | 0 (0)                | 5 (18.5)            |         |
| Stage 3                                           | 2 (40.0)             | 9 (33.3)            |         |
| APACHE III score                                  | 96 [81, 120]         | 106 [92, 134]       | 0.56    |

**Supplementary Table 5.** Arterial blood gas analysis and electrolytes in patients with severe metabolic acidosis. pH, PaO<sub>2</sub>, PaCO<sub>2</sub>, HCO<sub>3</sub>, Base Excess, and lactate were only measured for arterial blood samples.

|                                    | No SB (N=7)          | SB (N=39)            | p value |
|------------------------------------|----------------------|----------------------|---------|
| pH                                 | 7.12 [7.04, 7.19]    | 7.11 [7.06, 7.16]    | 0.42    |
| PaO <sub>2</sub> , mmHg            | 87.5 [83.7, 257.7]   | 153.0 [113.1, 288.0] | 0.42    |
| PaO <sub>2</sub> /FiO <sub>2</sub> | 142.2 [136.7, 284.9] | 310.0 [215.3, 456.9] | 0.12    |
| PaCO <sub>2</sub> , mmHg           | 36.6 [27.8, 38.0]    | 33.0 [26.0, 39.2]    | 0.80    |
| HCO <sub>3</sub> , mEq/L           | 13.0 [6.6, 13.8]     | 9.6 [6.7, 12.5]      | 0.49    |
| Base Excess, mEq/L                 | -15.2 [-24.5, -13.6] | -19.5 [-23.7, -16.3] | 0.58    |
| SID, mEq/L                         | 25.4 [21.4, 27.6]    | 24.1 [21.0, 29.1]    | 0.80    |
| Sodium, mEq/L                      | 134.0 [126.8, 136.5] | 136.0 [133.5, 138.0] | 0.15    |
| Potassium, mEq/L                   | 5.2 [4.1, 6.0]       | 4.5 [4.1, 4.9]       | 0.33    |
| Chloride, mEq/L                    | 99.0 [96.0, 106.5]   | 105.0 [100.0, 111.5] | 0.13    |
| Lactate, mmol/L                    | 7.0 [4.2, 16.6]      | 9.0 [4.5, 13.4]      | 0.95    |
| Ionised Calcium, mmol/L            | 1.1 [1.1, 1.2]       | 1.1 [1.0, 1.2]       | 0.13    |

SB denotes sodium bicarbonate; SID, strong ion difference = Sodium + Potassium + Ionised calcium - Chloride - Lactate.

**Supplementary Table 6.** ICU interventions in patients with severe metabolic acidosis at the time of metabolic acidosis diagnosis

|                                    | No SB (N=7)       | SB (N=39)         | p value |
|------------------------------------|-------------------|-------------------|---------|
| Vasopressor dose, µg/kg/min        | 0.00 [0.00, 0.22] | 0.11 [0.00, 0.40] | 0.28    |
| Cardiac index monitored            | 0 (0)             | 0 (0)             | N/A     |
| Respiratory support                |                   |                   | 0.51    |
| Not on mechanical ventilation      | 2 (28.6)          | 12 (30.8)         |         |
| Invasive mechanical ventilation    | 4 (57.1)          | 25 (64.1)         |         |
| Noninvasive mechanical ventilation | 1 (14.3)          | 1 (2.6)           |         |
| ECMO                               | 0 (0)             | 1 (2.6)           |         |
| Neuromuscular blockade             | 2 (28.6)          | 3 (7.7)           | 0.16    |
| Renal replacement therapy          |                   |                   | 0.57    |
| Not on RRT                         | 7 (100)           | 33 (84.6)         |         |
| CRRT                               | 0 (0)             | 6 (15.4)          |         |

SB denotes sodium bicarbonate; N/A, not applicable; ECMO, extracorporeal membrane oxygenation; RRT, renal replacement therapy; CRRT, continuous renal replacement therapy.

**Supplementary Table 7.** Characteristics at ICU admission in patients with Stage 2 or 3 AKI at the diagnosis of metabolic acidosis

|                                                   | No SB (N=34)         | SB (N=50)            | p value |
|---------------------------------------------------|----------------------|----------------------|---------|
| Age, years                                        | 67.6 [55.3, 80.3]    | 67.3 [55.4, 72.7]    | 0.43    |
| Sex, male                                         | 26 ( 76.5)           | 23 ( 46.0)           | 0.01    |
| Weight, kg                                        | 61.8 [54.4, 76.4]    | 63.6 [53.1, 74.0]    | 0.91    |
| Height, cm                                        | 166.5 [156.6, 174.3] | 164.0 [149.6, 171.5] | 0.17    |
| ICU admission source                              |                      |                      | 0.92    |
| Operation theatre                                 | 8 ( 23.5)            | 9 ( 18.0)            |         |
| Emergency department                              | 14 ( 41.2)           | 19 ( 38.0)           |         |
| Ward                                              | 10 ( 29.4)           | 19 ( 38.0)           |         |
| Other hospital                                    | 1 ( 2.9)             | 1 ( 2.0)             |         |
| ICU in other hospital                             | 1 ( 2.9)             | 2 ( 4.0)             |         |
| Treatment goals on admission                      |                      |                      | 0.46    |
| Full active management                            | 28 ( 82.4)           | 41 ( 82.0)           |         |
| Treatment limitation order                        | 6 ( 17.6)            | 7 ( 14.0)            |         |
| Palliative care                                   | 0 ( 0.0)             | 2 ( 4.0)             |         |
| Cardiac arrest in 24 hours prior to ICU admission | 5 ( 14.7)            | 8 ( 16.0)            | >0.99   |
| Chronic hemo/peritoneal-dialysis                  | 13 ( 39.4)           | 3 ( 6.0)             | <0.001  |
| Baseline creatinine, mmol/L                       | 271.4 [98.7, 524.9]  | 87.2 [54.2, 144.3]   | <0.001  |
| AKI                                               |                      |                      | >0.99   |
| Stage 2                                           | 8 ( 23.5)            | 11 (22.0)            |         |
| Stage 3                                           | 26 ( 76.5)           | 39 ( 78.0)           |         |
| APACHE III score                                  | 91.5 [69.3, 107.3]   | 110.0 [88.0, 144.5]  | 0.002   |

**Supplementary Table 8.** Arterial blood gas analysis and electrolytes in patients with Stage 2 or 3 AKI. pH, PaO<sub>2</sub>, PaCO<sub>2</sub>, HCO<sub>3</sub>, Base Excess, and lactate were only measured for arterial blood samples.

|                                    | No SB (N=34)            | SB (N=50)               | p value |
|------------------------------------|-------------------------|-------------------------|---------|
| pH                                 | 7.27 [7.20, 7.29]       | 7.19 [7.12, 7.25]       | 0.001   |
| PaO <sub>2</sub> , mmHg            | 111.50 [82.83, 143.22]  | 109.90 [83.10, 158.25]  | 0.902   |
| PaO <sub>2</sub> /FiO <sub>2</sub> | 251.23 [182.46, 342.11] | 255.00 [150.00, 372.22] | 0.86    |
| PaCO <sub>2</sub> , mmHg           | 38.05 [35.80, 46.38]    | 37.05 [31.05, 43.38]    | 0.314   |
| HCO <sub>3</sub> , mEq/L           | 16.90 [14.40, 20.48]    | 13.95 [10.03, 17.18]    | 0.001   |
| Base Excess, mEq/L                 | -8.95 [-12.72, -6.27]   | -13.45 [-17.88, -10.05] | <0.001  |
| SID, mEq/L                         | 32.89 [28.02, 36.30]    | 27.95 [23.57, 31.85]    | 0.066   |
| Sodium, mEq/L                      | 137.00 [134.00, 140.00] | 136.00 [133.00, 138.00] | 0.22    |
| Potassium, mEq/L                   | 4.70 [4.16, 5.43]       | 4.30 [3.80, 5.12]       | 0.108   |
| Chloride, mEq/L                    | 107.00 [104.50, 112.50] | 104.00 [102.00, 110.00] | 0.103   |
| Lactate, mmol/L                    | 1.60 [1.20, 4.05]       | 6.33 [1.40, 11.38]      | 0.022   |
| Ionised Calcium, mmol/L            | 1.12 [1.06, 1.21]       | 1.11 [1.02, 1.21]       | 0.271   |

SB denotes sodium bicarbonate; SID, strong ion difference = Sodium + Potassium + Ionised calcium - Chloride – Lactate.

**Supplementary Table 9.** ICU interventions in patients with Stage 2 or 3 AKI at the time of metabolic acidosis diagnosis

|                                    | No SB (N=34)      | SB (N=50)         | p value |
|------------------------------------|-------------------|-------------------|---------|
| Vasopressor dose, µg/kg/min        | 0.00 [0.00, 0.10] | 0.20 [0.01, 0.35] | 0.001   |
| Cardiac index monitored            | 0 ( 0.0)          | 6 ( 12.0)         | 0.10    |
| Respiratory support                |                   |                   | 0.61    |
| Not on mechanical ventilation      | 17 ( 50.0)        | 20 ( 40.0)        |         |
| Invasive mechanical ventilation    | 16 ( 47.1)        | 29 ( 58.0)        |         |
| Noninvasive mechanical ventilation | 1 ( 2.9)          | 1 ( 2.0)          |         |
| Neuromuscular blockade             | 6 ( 17.6)         | 3 ( 6.1)          | 0.19    |
| Renal replacement therapy          |                   |                   | 0.57    |
| Not on RRT                         | 22 ( 64.7)        | 34 ( 68.0)        |         |
| CRRT                               | 8 ( 23.5)         | 13 ( 26.0)        |         |
| IRRT                               | 4 ( 11.8)         | 3 ( 6.0)          |         |

SB denotes sodium bicarbonate; N/A, not applicable; ECMO, extracorporeal membrane oxygenation; RRT, renal replacement therapy; CRRT, continuous renal replacement therapy; IRRT, intermittent renal replacement therapy.

**Supplementary Table 10.** Association between administration of sodium bicarbonate and clinical

outcomes in patients with Stage 2 or 3 AKI (N = 84).

|                                                             | aOR, $\beta$ | 95% CI         | p-value |
|-------------------------------------------------------------|--------------|----------------|---------|
| ICU mortality                                               | 0.72         | 0.21 to 2.58   | 0.59    |
| Hospital mortality                                          | 1.13         | 0.37 to 4.14   | 0.83    |
| Vasopressor dose at 6h                                      | 0.06         | -0.02 to 0.14  | 0.15    |
| Vasopressor dose at 24h                                     | 0.07         | -0.02 to 0.16  | 0.15    |
| Mean arterial pressure at 6h                                | -1.13        | -8.09 to 5.39  | 0.73    |
| Mean arterial pressure at 24h                               | -6.54        | -13.49 to 0.42 | 0.07    |
| Delta mean arterial pressure per<br>vasopressor dose at 6h  | 1.89         | -6.85 to 10.41 | 0.67    |
| Delta mean arterial pressure per<br>vasopressor dose at 24h | 2.83         | -7.53 to 13.19 | 0.60    |

Delta mean arterial pressure per vasopressor dose = mean arterial pressure at 24h/(vasopressor dose at 24h +1) – mean arterial pressure at 6h/(vasopressor dose at 6h +1)
